# Supplementary material for: Overexpression of heparanase enhances T lymphocyte activities and intensifies the inflammatory response in a model of murine rheumatoid arthritis
Source: PubMed Central journal article supplement (PMC5388921; doi:10.1038/srep46229), 2017-04-12
Supplement: srep46229-s1.pdf [file srep46229-s1.pdf]

# Supplementary Figures and Tables

## **Overexpression of heparanase enhances T lymphocyte activities and intensifies the inflammatory response in a model of murine rheumatoid arthritis**

Andreas Digre<sup>1#</sup>, Kailash Singh<sup>2#</sup>, Magnus Åbrink<sup>3</sup>, Rogier M. Reijmers<sup>4</sup>,  
Stellan Sandler<sup>2</sup>, Israel Vlodavsky<sup>5</sup> and Jin-Ping Li<sup>1\*</sup>

<sup>1</sup>Department of Medical Biochemistry and Microbiology, University of Uppsala, The Biomedical Center, Box 582, SE-751 23 Uppsala, Sweden; <sup>2</sup>Department of Medical Cell Biology, Uppsala University, The Biomedical Center, Box 571, SE-751 23; <sup>3</sup>Department of Biomedical Sciences and Veterinary Public Health, Section of Immunology, Swedish University of Agricultural Sciences, VHC, Box 7028, SE-75007 Uppsala, Sweden  
<sup>4</sup>Department of Molecular Cell Biology and Immunology, VU University Medical Center, Amsterdam, The Netherlands; <sup>5</sup>Cancer and Vascular Biology Research Center, The Bruce Rappaport Faculty of Medicine, Technion, Haifa, Israel;

# These authors contributed equally to this work

\*To whom correspondence should be addressed: Jin-ping Li ([jin-ping.li@imbim.uu.se](mailto:jin-ping.li@imbim.uu.se)), Department of Medical Biochemistry and Microbiology, University of Uppsala, Uppsala, Sweden; Tel: 0046184714241

**Supplementary Figure S1: Histological analyses of the joint tissues.**

**a**

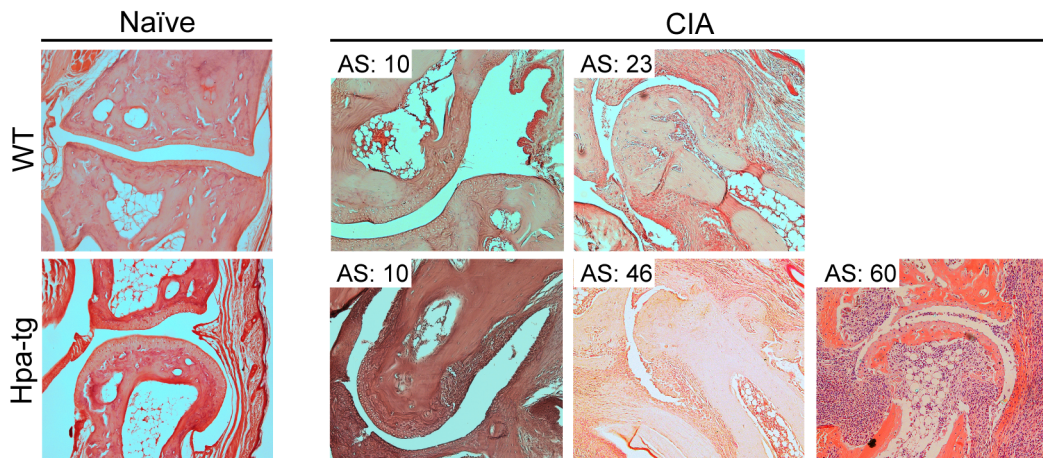

**b**

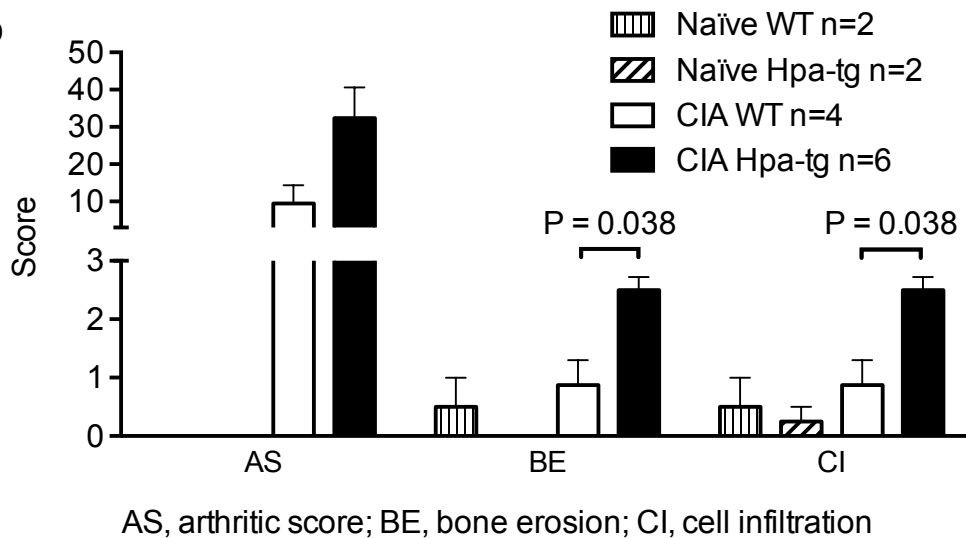

(a) Representative H&E stained sections of paw collected from naïve and collagen-induced WT and Hpa-tg mice. (b) Semi-quantitative analysis of bone/cartilage erosion (BE) and cell infiltration (CI). The data are mean values of affected joints in all arthritic mice. Data from naïve mice are mean values of all joints in one limb per mouse.

**Supplementary Figure S2: Western blot analysis of heparanase expression in primary cultured SF.**

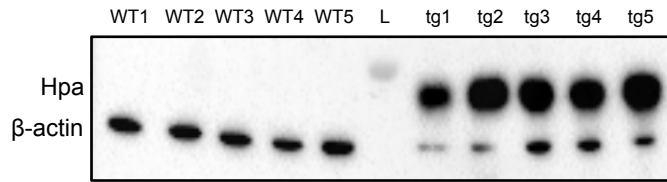

Comparative amounts of total protein (5  $\mu$ g) from SF cell lysates of each mouse (n=5) from each group were analysed using anti-heparanase antibody (#1453).  $\beta$ -actin was used as loading control. Protein standard ladder (L) band represent 55kDa. (WT: wildtype; tg: Hpa-tg)

**Supplementary Figure S3: High proportion of Hpa-tg CD11c<sup>+</sup> APCs among migrated PBMCs.**

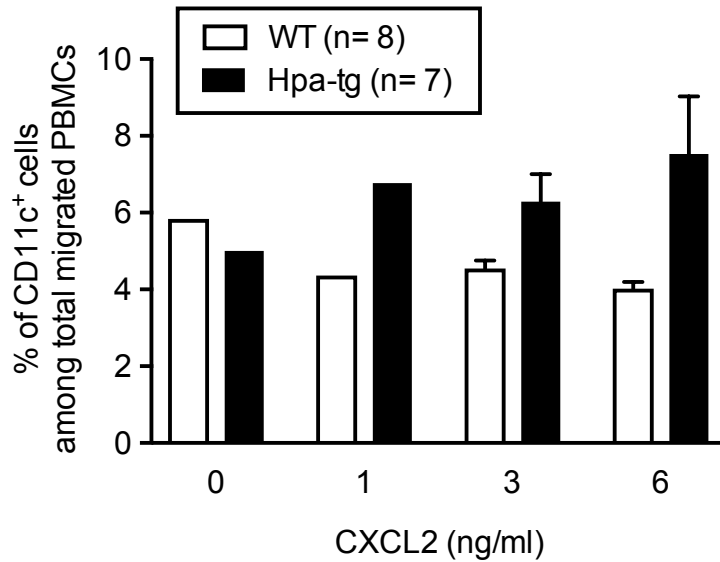

Proportion of CD11c<sup>+</sup> cells among migrated PBMC, isolated from WT (white bar; n=8) and Hpa-tg (black bar; n=7) mice 7 days post CIA, analyzed by trans-well migration assay at different concentrations of CXCL2 followed by flow cytometer analysis. The results are shown as means±SEM from duplicate (3 and 6 ng/ml CXCL2) or single (0 and 1 ng/ml CXCL2) measurements of pooled PBMCs.



**Supplementary Figure S4: Representative histograms of flow cytometer analysis of Helios<sup>+</sup> cells among CD4<sup>+</sup>CD25<sup>-</sup> and CD8<sup>+</sup> T cells.**

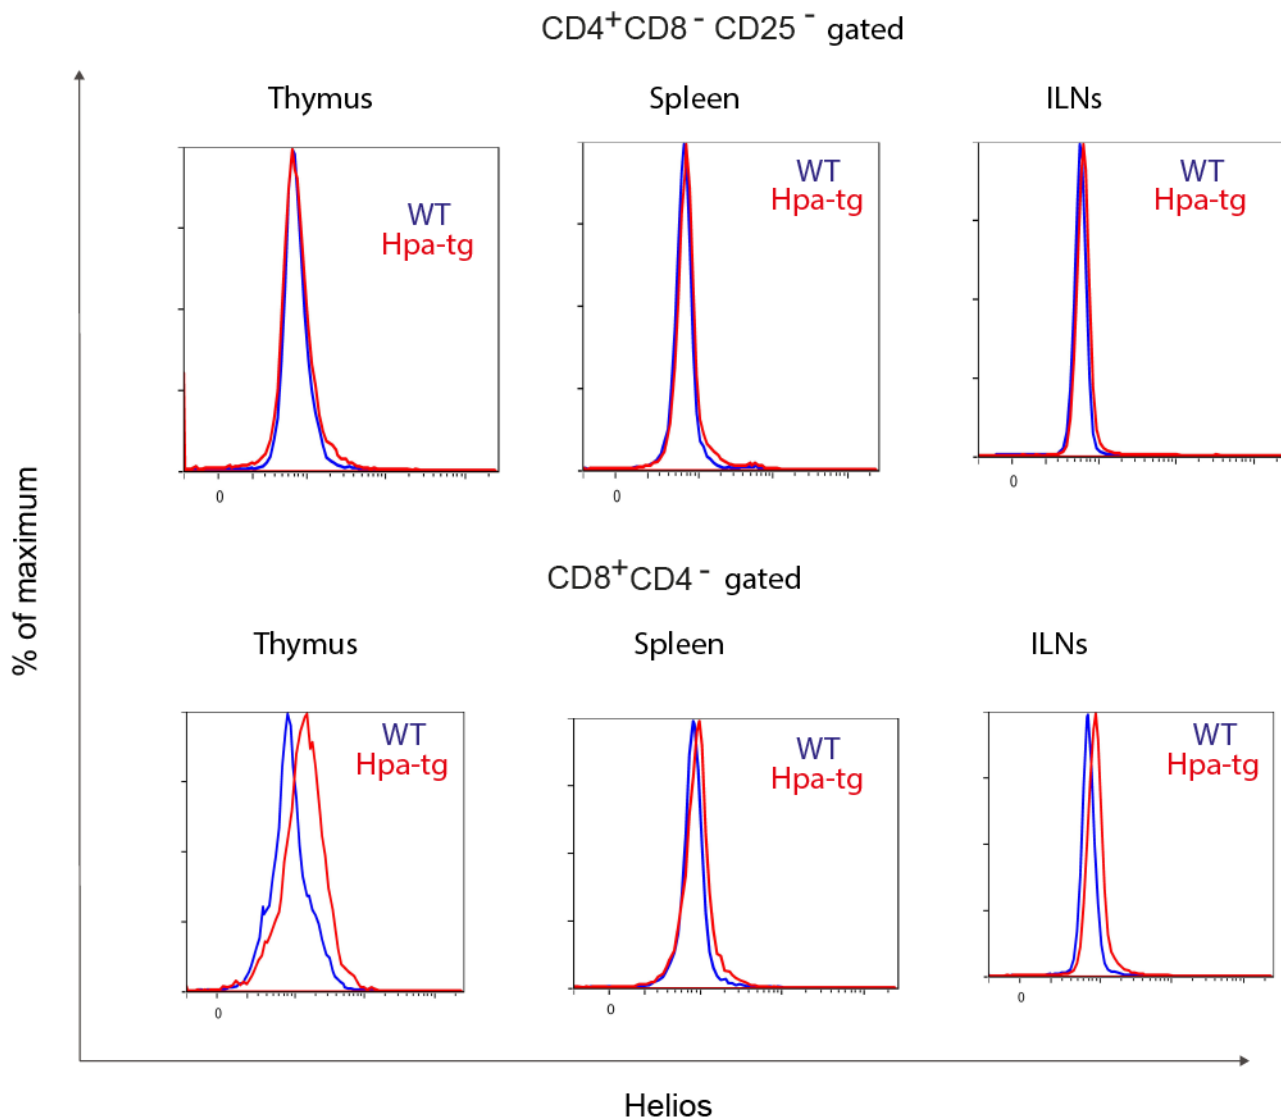

Representative histograms of flow cytometer analysis showing the gating strategy for detection of Helios<sup>+</sup> cells among CD4<sup>+</sup>CD25<sup>-</sup> and CD8<sup>+</sup> T cells in thymus, spleen and ILNS of CIA WT (blue area) and Hpa-tg (red area) mice.

**Supplementary Figure S5: Representative histograms of flow cytometer analysis of IFN- $\gamma$ <sup>+</sup> cells among CD4<sup>+</sup>CD25<sup>-</sup> and CD8<sup>+</sup> T cells.**

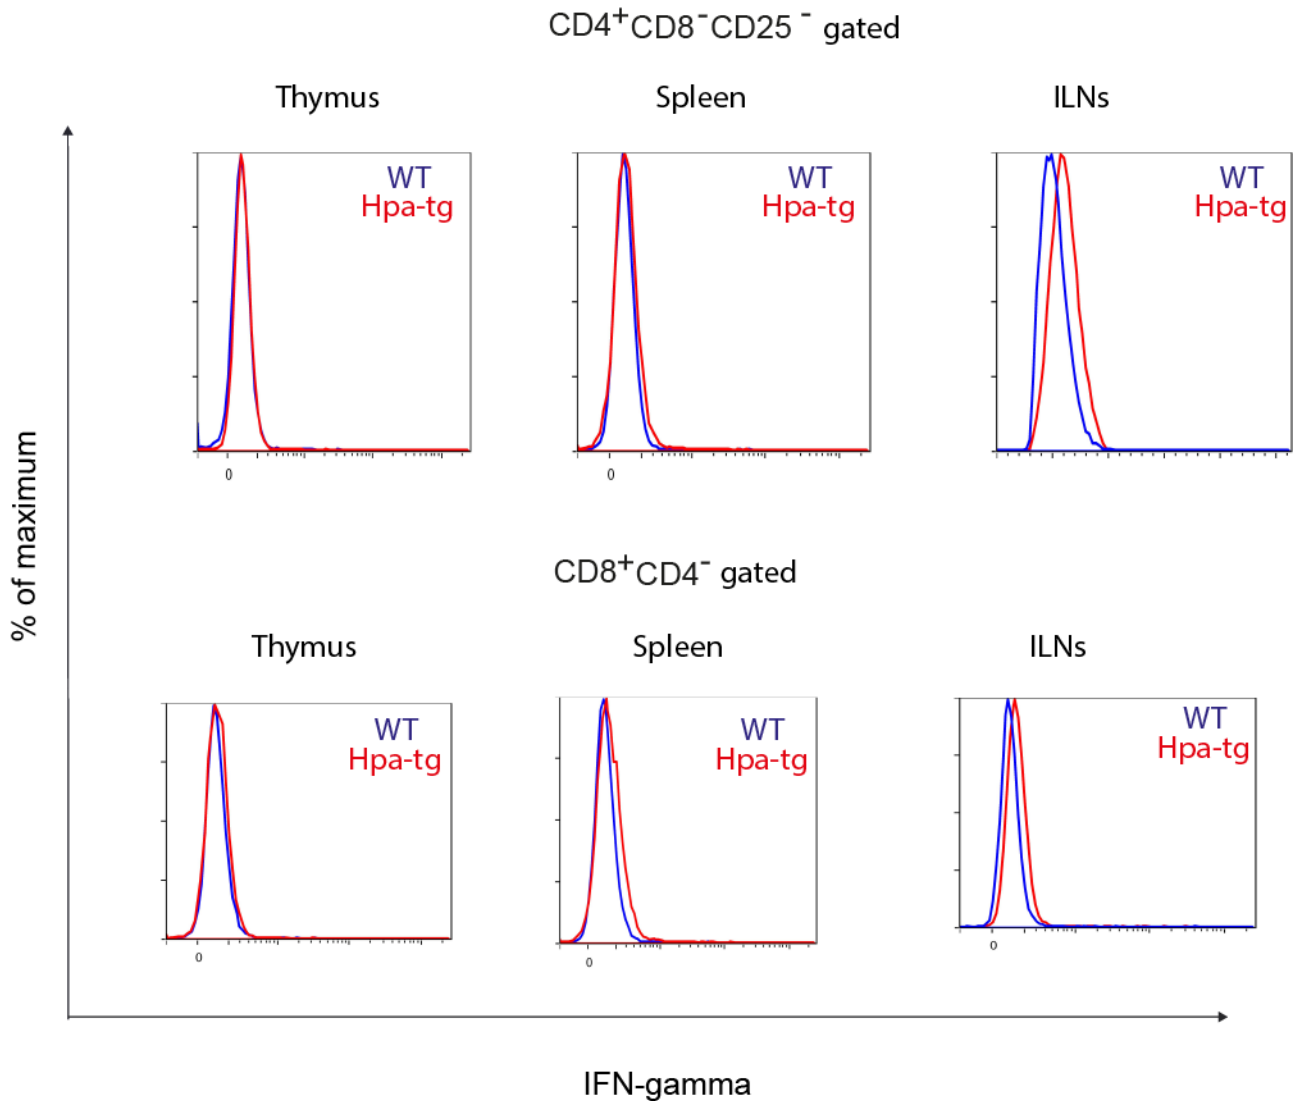

Representative histograms of flow cytometer analysis showing the gating strategy for detection of IFN- $\gamma$ <sup>+</sup> cells among CD4<sup>+</sup>CD25<sup>-</sup> and CD8<sup>+</sup> T cells in thymus, spleen and ILNs of CIA WT (blue area) and Hpa-tg (red area) mice.

**Supplementary Figure S6: Representative histograms of flow cytometer analysis of IL-17a cells among CD4<sup>+</sup>CD8<sup>-</sup>CXCR5<sup>+</sup>PD-1<sup>+</sup> and CD8<sup>+</sup>CD4<sup>-</sup>CXCR5<sup>+</sup>PD-1<sup>+</sup> T cells.**

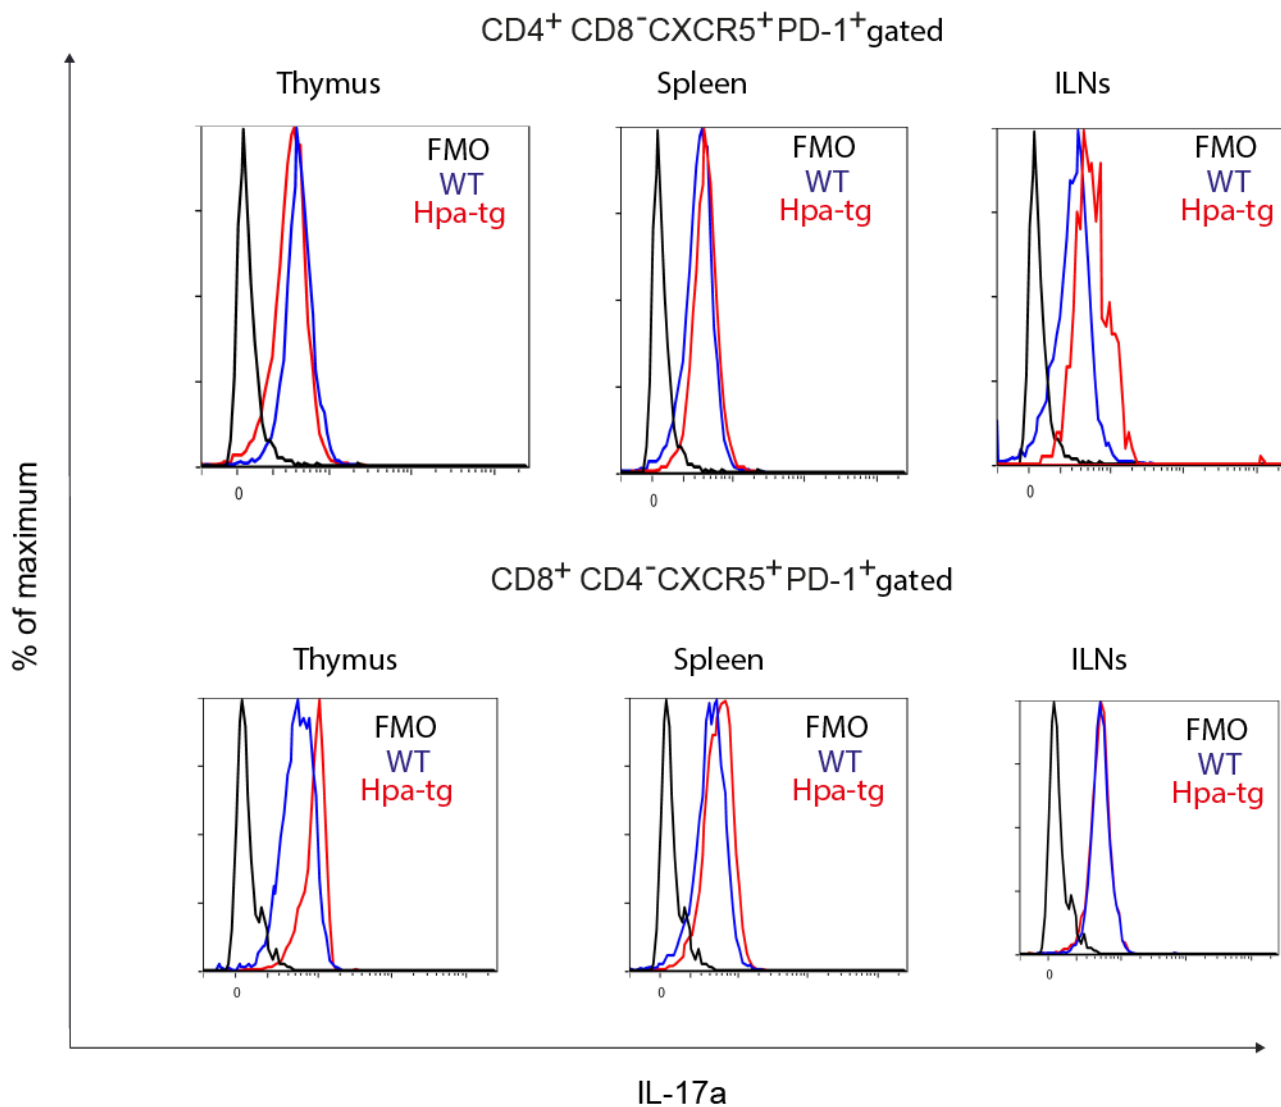

Representative histograms of flow cytometer analysis showing the gating strategy for detection of IL-17a cells among CD4<sup>+</sup>CD8<sup>-</sup>CXCR5<sup>+</sup>PD-1<sup>+</sup> and CD8<sup>+</sup>CD4<sup>-</sup>CXCR5<sup>+</sup>PD-1<sup>+</sup> T cells in thymus, spleen and ILNs of CIA WT (blue area) and Hpa-tg (red area) mice.

**Supplementary Figure S7: Representative histograms of flow cytometer analysis of IFN- $\gamma$ <sup>+</sup> cells among CD4<sup>+</sup>CD25<sup>+</sup>Foxp3<sup>+</sup> Treg cells.**

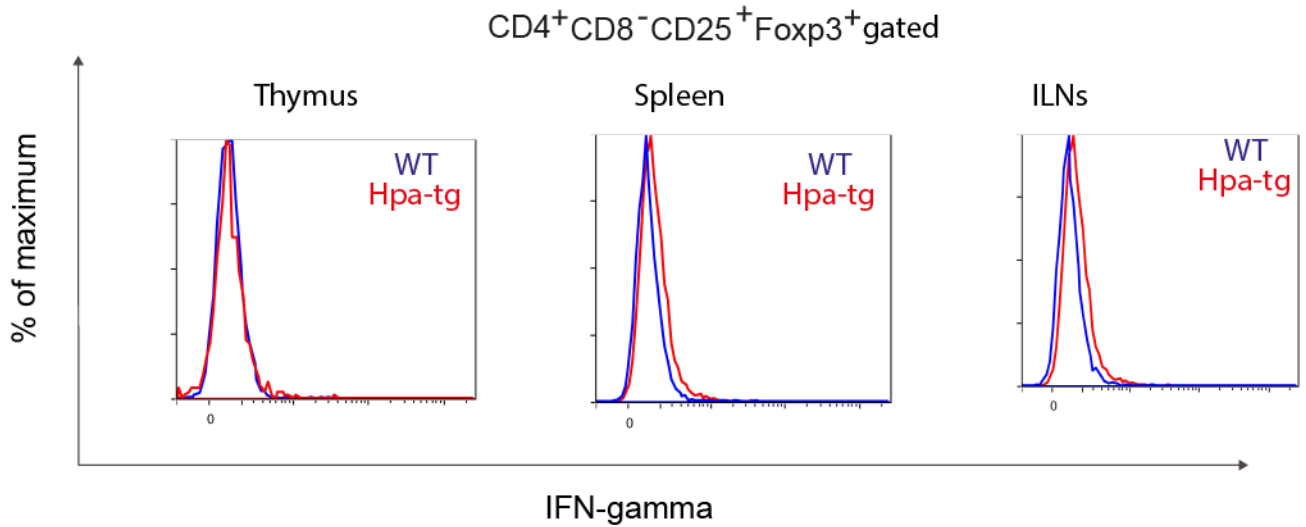

Representative histograms of flow cytometer analysis showing the gating strategy for detection of IFN- $\gamma$ <sup>+</sup> cells among CD4<sup>+</sup>CD25<sup>+</sup>Foxp3<sup>+</sup> Treg cells in thymus, spleen and ILNs of CIA WT (blue area) and Hpa-tg (red area) mice.

**Supplementary Figure S8: Increased number of T cells in the germinal center (GC) of end-stage CIA Hpa-tg mouse lymph nodes (LNs).**

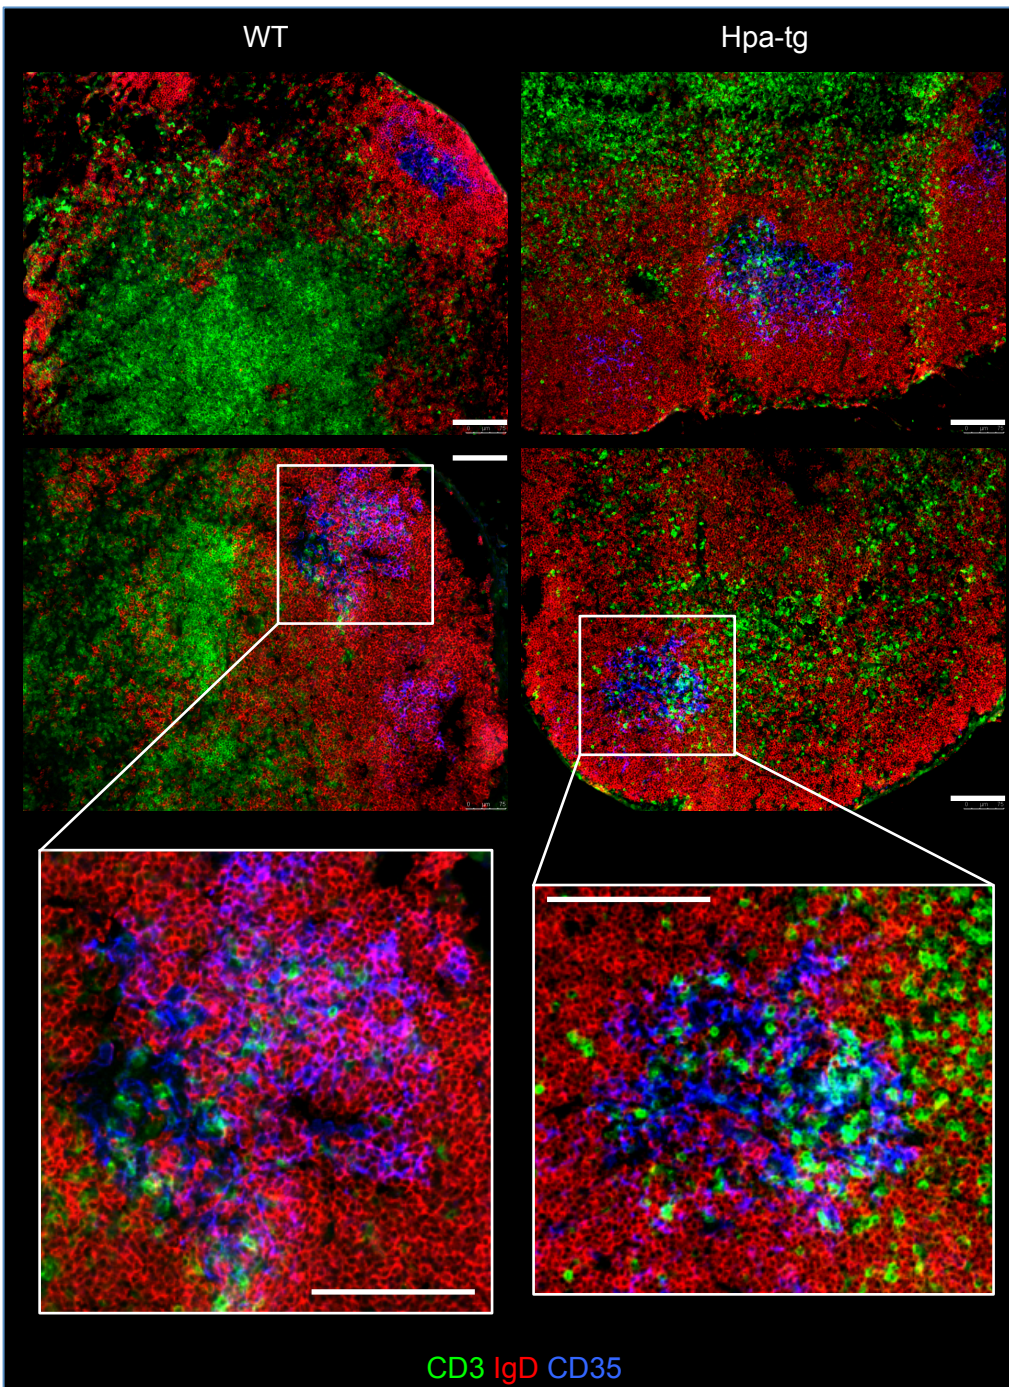

Cellular organization of end-stage CIA WT and Hpa-tg mouse LNs were examined by immunohistological staining of T cells (CD3, green), B cells (IgD, red) and follicular dendritic cells (CD35, blue). Scale bar represent 100  $\mu$ m.

**Supplementary Figure S9: Higher proportions of Ki-67<sup>+</sup> cells in Hpa-tg mouse spleen and ILNs.**

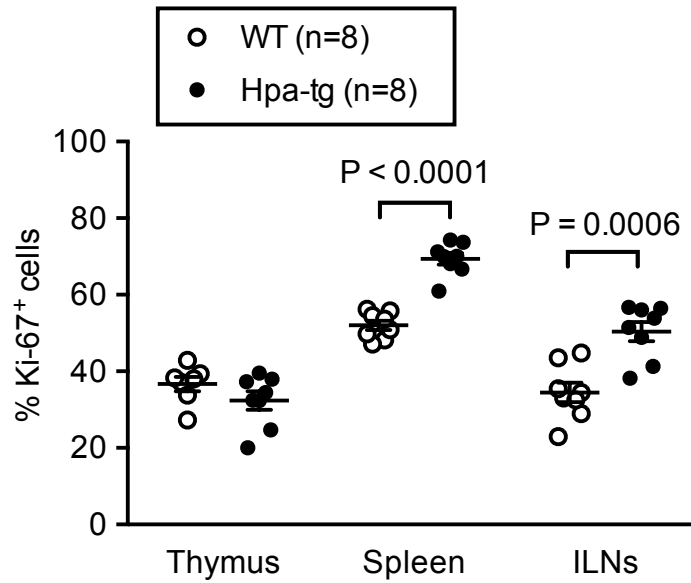

The proportion of Ki-67<sup>+</sup> cells in immune organs from WT (open circle) and Hpa-tg (closed circle) mice is shown. The results are shown as means±SEM (n=8 in each group).

**Supplementary Figure S10: Proportions of CCR6<sup>+</sup> cells among CD4<sup>+</sup> and CD8<sup>+</sup> T cells, CD11c<sup>+</sup> APCs and Ly6G<sup>+</sup> neutrophils.**

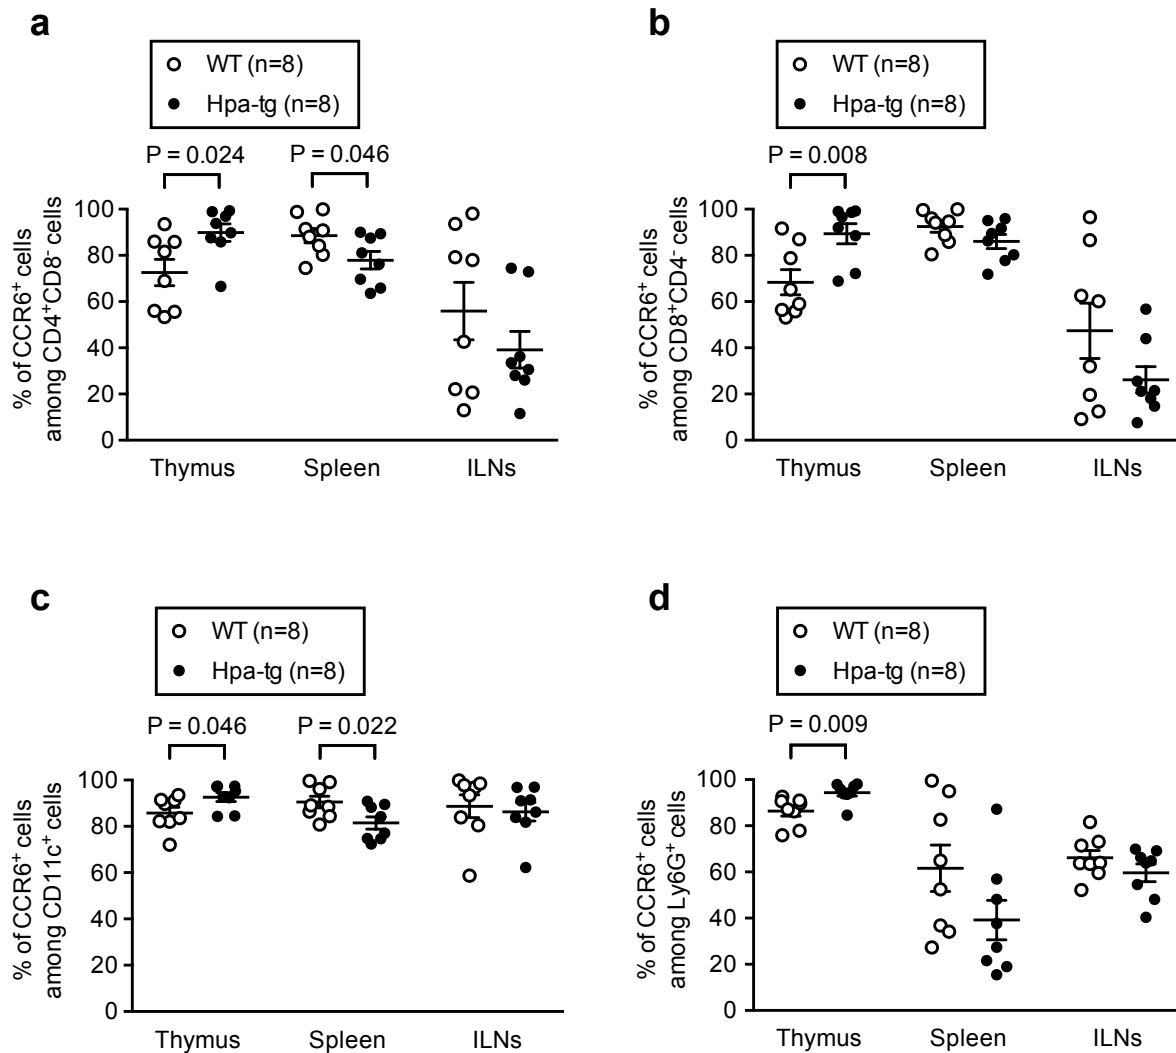

The proportion of CCR6<sup>+</sup> cells among (a) CD4<sup>+</sup>CD8<sup>-</sup> T cells, (b) CD8<sup>+</sup>CD4<sup>-</sup> T cells, (c) CD11c<sup>+</sup> APCs and (d) Ly6G<sup>+</sup> neutrophils of WT (open circle) and Hpa-tg (closed circle) mice is shown. The results are shown as means±SEM (n=8 in each group).

## Supplementary Table S1: CIA end point day and arthritic score.

| Arthritic score of paw swelling |         |                 |
|---------------------------------|---------|-----------------|
| WT                              | End day | Arthritic score |
| B1                              | 85      | 0               |
| B3                              | 85      | 0               |
| F2                              | 85      | 0               |
| F3                              | 85      | 0               |
| A1                              | 85      | 2               |
| A2                              | 85      | 3               |
| A3                              | 85      | 10              |
| F1                              | 85      | 23              |
| Hpa-tg                          | End day | Arthritic score |
| C2                              | 85      | 0               |
| D1                              | 85      | 0               |
| D2                              | 85      | 0               |
| D3                              | 85      | 0               |
| E3                              | 85      | 0               |
| G1                              | 85      | 0               |
| G2                              | 85      | 0               |
| C3                              | 85      | 10              |
| E1                              | 85      | 14              |
| H2                              | 74*     | 20              |
| C1                              | 74*     | 44              |
| H1                              | 64*     | 46              |
| E2                              | 40*     | 60              |

\*Mice sacrificed due to the severe symptoms

End point day and arthritic score of paw swelling in CIA WT (light grey) and Hpa-tg (dark grey) mice, with a maximum score of 60. Asterix (\*) indicates mice sacrificed early due to severe symptoms.



## Supplementary Table S2: Antibodies used for flow cytometer analysis.

| Flow cytometer antibodies |              |                 |              |
|---------------------------|--------------|-----------------|--------------|
| Cell surface markers      | Clone        | Fluorescent tag | Manufacturer |
| CD4                       | RM4-4        | FITC            | eBioscience  |
| CD25                      | PC61         | PE              | eBioscience  |
| CD8                       | 53-6.7       | APC-H7          | BD           |
| CXCR5                     | 2G8          | APC             | BD           |
| PD-1                      | J43          | BV605           | BD           |
| CD19                      | 1D3          | BV605           | BioLegend    |
| B220                      | RA3-6B2      | PEcy7           | BioLegend    |
| Ly6G                      | 1A8          | BV421           | BioLegend    |
| CD11c                     | N418         | APC             | BioLegend    |
| PDCA-1                    | 927          | PE              | BioLegend    |
| CD11b                     | M1/70        | FITC            | BioLegend    |
| CCR6                      | 29-2L17      | PE              | BioLegend    |
| Intracellular markers     |              |                 |              |
| Foxp3                     | FJK-16s      | PEcy7           | eBioscience  |
| IL-17a                    | TC11-18H10.1 | APC or PE       | BioLegend    |
| Helios                    | 22F6         | Pacific Blue    | BioLegend    |
| Ki-67                     | 16A8         | PE              | BioLegend    |

Marker, clone name, fluorescent tag and manufacturer of antibodies used in the study. The table is divided into cell surface (light grey) and intracellular (dark grey) markers.
